# Quantitative characterization of translational ribo regulators using an in vitro transcription-translation system

Anis Senoussi,<sup>†,⊥</sup> Jonathan Lee Tin Wah,<sup>†,⊥</sup> Yoshihiro Shimizu,<sup>‡</sup> Jérôme  
Robert,<sup>†</sup> Alfonso Jaramillo,<sup>¶, #</sup> Sven Findeiss,<sup>§, @</sup> Ilka M. Axmann,<sup>||</sup> and André  
Estevez-Torres<sup>\*, †, ⊥</sup>

<sup>†</sup>*Sorbonne Universités, UPMC Univ Paris 06, Laboratoire Jean Perrin, F-75005, Paris, France*

<sup>‡</sup>*Laboratory for Cell-Free Protein Synthesis, RIKEN Quantitative Biology Center, 6-2-3,  
Furuedai, Suita, Osaka 565-0874, Japan*

<sup>¶</sup>*School of Life Sciences and WISB, University of Warwick, Gibbet Hill Road, Coventry, CV4  
7AL, United Kingdom*

<sup>§</sup>*Dept. Computer Science, and Interdisciplinary Center for Bioinformatics, University Leipzig,  
Härtelstrasse 16-18, D-04107 Leipzig, Germany*

<sup>||</sup>*Institute for Synthetic Microbiology, Cluster of Excellence on Plant Sciences (CEPLAS),  
Heinrich Heine University Düsseldorf, Universitätsstrasse 1, 40225 Düsseldorf, Germany*

<sup>⊥</sup>*UMR 8237, CNRS, F-75005, Paris, France*

<sup>#</sup>*Institute of Systems and Synthetic Biology, Batiment Geneavenir 6, 5, rue Henri Desbruères,  
91030 Evry Cedex, France*

<sup>@</sup>*University of Vienna, Faculty of Computer Science, Research Group Bioinformatics and  
Computational Biology and Faculty of Chemistry, Department of Theoretical Chemistry,  
Währingerstrasse 29, A-1090 Vienna, Austria*

E-mail: [andre.estevez-torres@upmc.fr](mailto:andre.estevez-torres@upmc.fr)

## Abstract

Riboregulators are short RNA sequences that, upon binding to a ligand, change their secondary structure and influence the expression rate of a downstream gene. They constitute an attractive alternative to transcription factors for building synthetic gene regulatory networks because they can be engineered de novo and they have a fast turnover and a low metabolic burden. However, riboregulators are generally designed in silico and tested in vivo, which only provides a yes/no evaluation of their performances, thus hindering the improvement of design algorithms. Here we show that a cell-free transcription-translation (TX-TL) system provides valuable quantitative information about the performances of in silico designed riboregulators. In particular, we use the ribosome as an exquisite molecular machine that detects functional riboregulators, precisely measures their concentration and linearly amplifies the signal by generating a fluorescent protein. We apply this method to characterize two types of translational riboregulators composed of a cis-repressed (cr) and a trans-activating (ta) strand. At the DNA level we demonstrate that high concentrations of taDNA poisoned the activator until total shut off. At the RNA level, we show that this approach provides a fast and simple way to measure dissociation constants of functional riboregulators, in contrast to standard mobility-shift assays. Our method opens the route for using cell-free TX-TL systems for the quantitative characterization of functional riboregulators in order to improve their design in silico.

## Keywords

in vitro synthetic biology, RNA translational riboregulator, cell-free protein synthesis

## 24 1 Introduction

25 During the early wave of synthetic biology (*1, 2*), known transcription factors were wired  
26 to their corresponding promoter sequences to control the expression of other transcription  
27 factors or effector proteins. While this approach has been very successful in engineering  
28 gene regulatory networks (GRNs) (*3*) with few nodes, the number of different elements in  
29 synthetic GRNs has stagnated at 5-6 (*4*). Two arguments may explain this limit. First,  
30 protein-DNA interactions are very difficult to design, although very promising computation  
31 methods are arising (*5*); the engineer must thus choose well-known transcription factor-  
32 promoter pairs. Second, the expression of these transcription factors imposes a metabolic  
33 burden to the cells (*6*).

34 Implementing regulatory circuits at the RNA level may help solving these issues because  
35 RNA-RNA interactions can be predicted from the sequence (*7-9*) and protein expression is  
36 not needed for regulation, which lowers the metabolic burden. The principal component of  
37 an RNA-regulated GRN is the riboregulator: an RNA sequence in the 5' untranslated region  
38 (UTR) of a gene of interest that has an effect on its expression rate. Since they were first used  
39 in synthetic biology more than a decade ago (*10*), several riboregulators have been designed  
40 and implemented in vivo, both in procaryotic (*11-15*) and eukaryotic cells (*16*). However,  
41 their design remains more difficult than expected and many implementations do not work in  
42 vivo (*17*). One reason to this is that structure-prediction tools do not yet precisely capture  
43 the complexity involved in the folding of RNA species several hundreds of nucleotides long.  
44 In silico design needs furthermore a structural model on how regulation should work, which  
45 needs to be transformed into predictable features in order to generate optimized sequences.  
46 Another reason is that it is hard to control and tune the copy number of plasmids or genes  
47 in vivo and thus testing new parts in vivo (*18, 19*) often provides a yes/no answer that is  
48 difficult to correlate with thermodynamical parameters used in silico.

49 Including a phase of in vitro testing in the workflow of engineering riboregulators could  
50 potentially solve these problems. Structural characterization of riboregulators (*20, 21*) helps

51 assessing the correctness of the designed structures but does not provide functional informa-  
52 tion and often involves complex experimental procedures. To overcome these difficulties and  
53 accelerate the improvement of *in-silico* designs, cell-free transcription-translation (TX-TL)  
54 platforms are an attractive tool for testing genetic regulatory modules in synthetic biology  
55 (22, 23). First, TX-TL in vitro testing can be used to qualitatively evaluate the perfor-  
56 mances of new designs in a faster manner, as it has been recently proposed (23). Second,  
57 it can provide quantitative data such as thermodynamic and kinetic rates that are of great  
58 value to improve in silico methods.

59 Here we used a purified TX-TL platform to illustrate the second approach. Its main  
60 advantage is that it uses the ribosome as an exquisite molecular machine that detects and  
61 amplifies the signal of functional riboregulators with great specificity, without making an a  
62 priori hypothesis about the structure of functional regulators. Importantly, we characterize  
63 the riboregulator dynamics at the DNA and RNA level, which allows to independently study  
64 transcription and translation and clearly pinpoint design shortcomings. Finally, our method  
65 provides dissociation constants of translational riboregulators that may help improving in  
66 silico design routines.

## 67 **2 Results and discussion**

### 68 **2.1 Translation rate vs. structure as the optimization goal for a** 69 **riboregulator**

70 Our study focuses on translational riboregulators, which are composed of two RNA strands  
71 (Figure 1A). One of them, called cis repressed RNA, noted  $R_{cr}$ , about 800 nucleotides (nt)  
72 long, codes for a gene but bears a hairpin in its 5'-untranslated region (5'-UTR) that prevents  
73 the ribosome to start reading the downstream gene. The other one, a small trans-activating  
74 RNA, about 100 nt long, noted  $R_{ta}$ , hybridizes to the 5'-UTR of  $R_{cr}$ , opens up the hairpin  
75 and forms an active complex,  $R_{act}$ , which translation rate is increased.

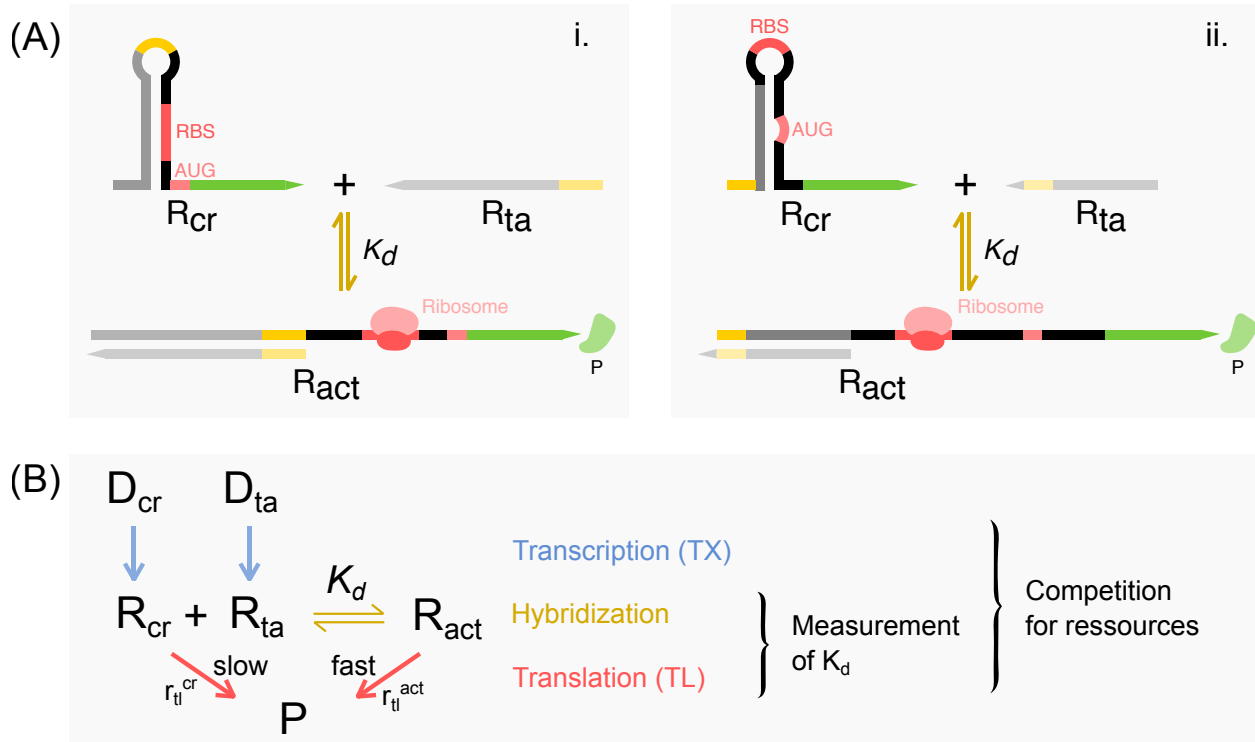

Figure 1: Principle of a translational riboregulator and of its characterization using a cell-free transcription-translation system (TX-TL). (A) Sketches of the two operation modes of translational riboregulators functioning as an activator. The 5'-UTR of  $R_{cr}$  RNA, forms a hairpin that hides either the ribosome binding site (RBS, i.) or the start codon (AUG, ii.) away from the ribosome.  $R_{ta}$  hybridizes with  $R_{cr}$ , unwinding the hairpin and liberating the RBS and/or the AUG promoting translation. (B) Mechanism of transcription, riboregulation through RNA hybridization and translation used in this work. DNA sequences  $D_{cr}$  and  $D_{ta}$  are transcribed into a cis-repressed,  $R_{cr}$ , and a trans-activator,  $R_{ta}$ , RNA strands.  $R_{cr}$  may be slowly translated into protein P or hybridize with  $R_{ta}$  to form  $R_{act}$  that is translated more rapidly into P. Measuring the dynamics of fluorescence production by a fluorescent protein P provides information about resource competition when evaluating the system at the DNA level and quantitative values of dissociation constants  $K_d$  when RNA concentration is fixed.

76 Ultimately, the riboregulator engineer is interested in controlling the rate of translation  
77 for  $R_{cr}$  and  $R_{act}$ , noted respectively  $r_{tl}^{cr}$  and  $r_{tl}^{act}$ , and seek the objective  $r_{tl}^{act} \gg r_{tl}^{cr} \approx 0$  for  
78 an activator (Figure 1B). For convenience we assign a species name to an RNA sequence,  
79 but one must bear in mind that a given RNA sequence, for instance  $R_{cr}$ , may fold in an  
80 ensemble of different structures  $\{R_{cr}^i\}$ , with different translation rates  $\{r_{tl}^{cr,i}\}$ . Current in  
81 silico design methods (9, 24) compute the ensemble of secondary structures  $\{R_{cr}^i, R_{ta}^j, R_{act}^k\}$   
82 that minimizes free energy. However, the structure-to-function relationship that associates an  
83 RNA conformation with its translation rate is hard to establish. Thus, a set of heuristic rules  
84 attributes low values of translation rates  $r_{tl}^{cr,i}$  to structures where the RBS or the start codon  
85 are buried in a hairpin (Figure 1), and high values of  $r_{tl}^{act,k}$ , to structures where these are  
86 accessible. However, these heuristic rules often fail. Moreover, minimizing the free energy of  
87 the RNA structures implies that the hypothesis of thermodynamic equilibrium holds, which  
88 is far from being true in vivo where co-transcriptional folding and RNA chaperones are the  
89 rule (25, 26).

90 To shed light into this problem we measured translation rates of recently in silico designed  
91 riboregulators (18, 19). Considering the difficulty of measuring translation rates in vivo,  
92 in particular because it is hard to control the equilibrium concentrations  $\bar{R}_{cr}$  and  $\bar{R}_{act}$ , we  
93 used a cell-free TX-TL system called PURE system (Protein synthesis Using Recombinant  
94 Elements) (27). The PURE is composed of purified recombinant elements necessary for  
95 transcribing and translating a coding DNA or RNA sequence, totally in vitro. Briefly, the  
96 PURE system includes T7 RNA polymerase, an energy-coupling module for NTP regener-  
97 ation, transfer RNAs, ribosomes, translation initiation, elongation and release factors in a  
98 suitable buffer (28, 29). By its intrinsic flexibility, a TX-TL system allows us to precisely  
99 tune the relative concentrations of the two components of a riboregulator at the DNA and  
100 at the RNA level. Moreover, the PURE system contains low level of ribonucleases, which is  
101 an essential property for having a reproducible and easily modelisable system (30).

## 102 2.2 The TX-TL system linearly amplifies the concentration of ac- 103 tive RNA

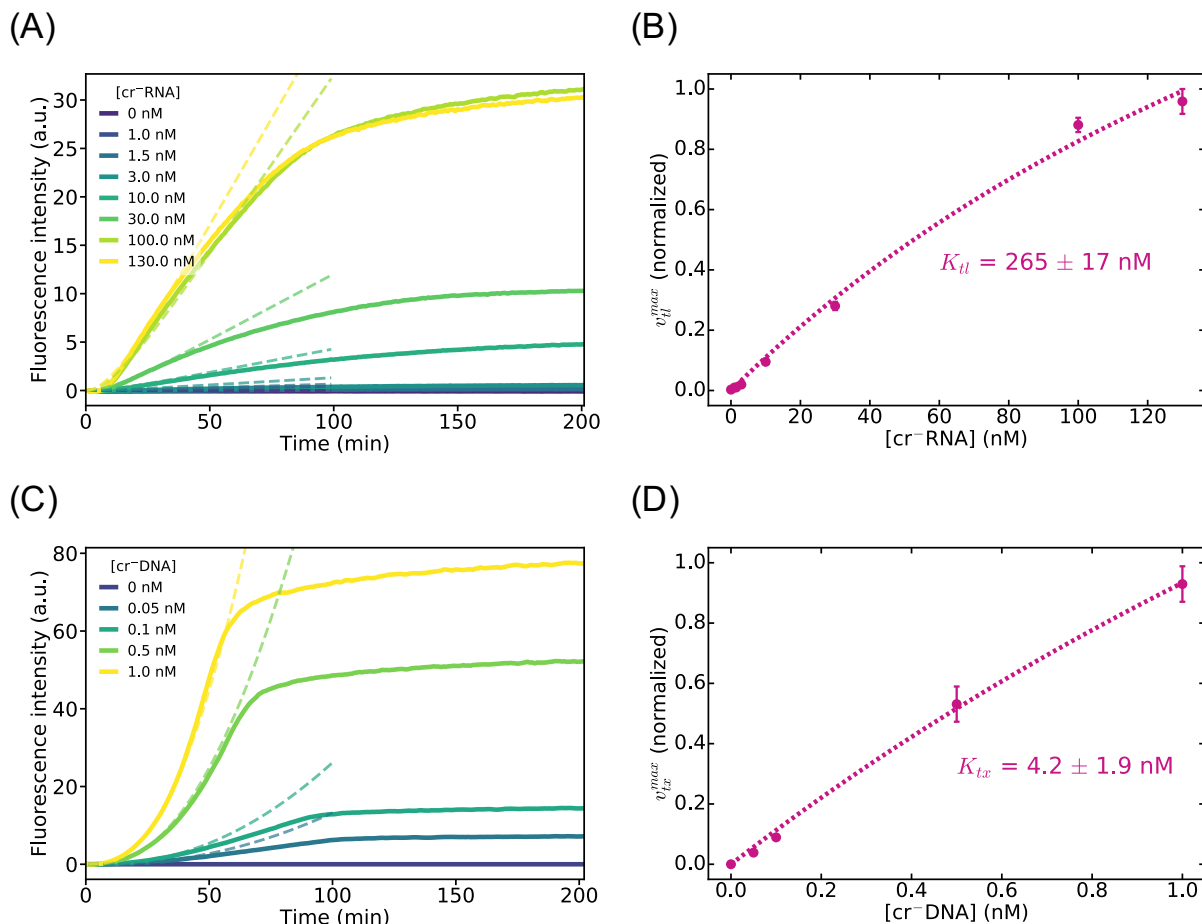

Figure 2: Characterization of the TX-TL system in the absence of riboregulation. Translation dynamics (A) and maximum fluorescence production rate (B) for increasing concentrations of an unregulated mRNA fragment coding for GFP. Expression (transcription and translation) dynamics (C) and maximum fluorescence production rate (D) for increasing concentrations of an unregulated linear DNA fragment coding for GFP. Solid lines (A,C) and disks (B,D) represent data, dotted lines are fits to the model. Error bars correspond to one sigma of a triplicate experiment.

104 We first characterized the translation and expression (transcription and translation) re-  
105 actions of the PURE system in the absence of riboregulation. To do so, we prepared by PCR  
106 a linear DNA fragment coding for a green fluorescent protein (GFP) with no upstream regu-  
107 latory region, called cr-DNA. It is composed of a T7 RNA polymerase promoter, a ribosome

108 binding site and the GFP-coding sequence. To simplify transcription termination we did not  
109 add a terminator site at the end of the linear DNA fragment. In addition, we prepared by  
110 in vitro transcription the corresponding messenger RNA, cr<sup>-</sup>RNA, from cr<sup>-</sup>DNA. We suc-  
111 cessively used cr<sup>-</sup>RNA and cr<sup>-</sup>DNA as the coding nucleic acid input of the TX-TL system.  
112 We varied the concentration of the input and we measured the fluorescence emitted by the  
113 GFP produced over time (Figure 2). Starting from cr<sup>-</sup>RNA, the translation module of the  
114 TX-TL system actively produced GFP during 2 hours. The translation kinetics displayed  
115 three different phases: during about 5 min no signal was discernable from the background  
116 level, then followed a phase of quasi-linear increase during 100 min, that slowed down until a  
117 plateau was reached (Figure 2A). In the range 0 – 80 nM of cr<sup>-</sup>RNA, both the final intensity  
118 and the maximum rate of fluorescence growth,  $v_{tl}^{max}$  increased linearly with the initial quan-  
119 tity of coding RNA (Figure 2B). For higher concentrations there was a saturation: putting  
120 more RNA template did not increase significantly the final yield or the maximal production  
121 rate. When using cr<sup>-</sup>DNA as the initial input, the dynamics of the fluorescence intensity  
122 showed both common and contrasting features with the previous case (Figure 2C). Three  
123 phases were still observed: delay, growth and a plateau. However, the delay observed before  
124 an increase of fluorescence was now of 15 min. Finally, the quantity of DNA required to sat-  
125 urate the maximum rate of fluorescence growth,  $v_{tx}^{max}$ , was almost two orders of magnitude  
126 lower than the quantity of RNA that saturated translation (Figure 2D).

127 We propose a simple quantitative kinetic model that fits our data. To take into ac-  
128 count the saturation of the production rates we assigned Michaelis-Menten kinetics to the  
129 transcription and the translation reactions. As a plausible source of the initial delay in the  
130 translation reaction, we included a first-order step of maturation of the non-fluorescent GFP  
131 protein, noted P, into the functional fluorescent protein P\*. This is in accordance to pub-  
132 lished maturation times (31). We neglected DNA and RNA degradation and we did not  
133 take into consideration the depletion of resources because we analyzed our data between  
134 0 and 50 min. For these reasons, our model did not reach a plateau in P\* concentration



135 (Figure 2A-C and Figure S2). These approximations are valid as long as the RNA molecules  
 136 do not deteriorate and the enzymatic resources, more specifically the ribosomes, are not  
 137 depleted. We thus write the following mechanism

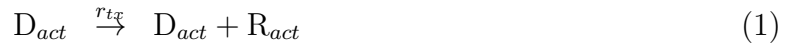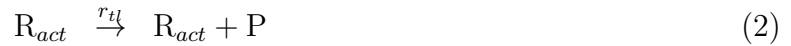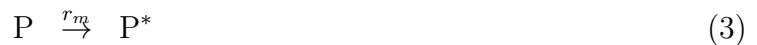

138 where  $D_{act}$  and  $R_{act}$  are, respectively,  $cr^-$ -DNA and  $cr^-$ -RNA and  $r_{tx}$ ,  $r_{tl}$  and  $r_m$  are, re-  
 139 spectively, the transcription, translation and maturation rates. With the aforementioned  
 140 hypotheses, this mechanism is associated with the rate equations

$$\frac{dD_{act}}{dt} = 0 \quad (4)$$

$$\frac{dR_{act}}{dt} = r_{tx} = \frac{k_{tx} \cdot D_{act}}{K_{tx} + D_{act}} \quad (5)$$

$$\frac{dP}{dt} = r_{tx} - r_m = \frac{k_{tl} \cdot R_{act}}{K_{tl} + R_{act}} - k_m \cdot P \quad (6)$$

$$\frac{dP^*}{dt} = r_m = k_m \cdot P \quad (7)$$

141 where  $k_x$  and  $K_x$  are, respectively, the rate and the Michaelis-Menten constants of reaction  $x$   
 142 and species concentrations are noted in italics. Equations (4-7) have exact solutions both for  
 143 initial conditions corresponding to the translation ( $D_{act}(0) = 0$ ,  $R_{act}(0) \neq 0$ ) and expression  
 144 experiments ( $D_{act}(0) \neq 0$ ,  $R_{act}(0) = 0$ ) (SI Section 4). For translation we obtain (SI Section  
 145 3.1)

$$P^*(t) = \frac{R_{act}(0)}{K_{tl} + R_{act}(0)} \frac{k_{tl}}{k_m} (e^{-k_m t} + k_m t - 1) \quad (8)$$

146 Note that when the ribosome is not saturated,  $R_{act}(0) \ll K_{tl}$ , we can define a function  
147  $c(k_{tl}, k_m, t)$  that does not depend on  $R_{act}(0)$  and write

$$P^*(t) \approx c(k_{tl}, k_m, t) \cdot R_{act}(0) \quad (9)$$

148 explicitly showing that translation acts as a linear amplifier of the initial concentration of  
149 active RNA. For expression, the exact solution is given in SI Section 3.3, here we provide an  
150 approximated solution when  $R_{act}(t) \ll K_{tl}$  (SI Section 3.2),

$$P^*(t) \approx \frac{D_{act}(0)}{K_{tx} + D_{act}(0)} \frac{k_{tx}k_{tl}}{2K_{tl}} \left( t^2 - \frac{2}{k_m}t + \frac{2}{k_m^2}(1 - e^{-k_mt}) \right) \quad (10)$$

151 Considering that the fluorescence intensity is proportional to  $P^*$  we fitted (8) and (10)  
152 to the data in Figure 2. We obtained  $K_{tx} = 4.2 \pm 1.9$  nM,  $K_{tl} = 265 \pm 17$  nM and  $k_m =$   
153  $0.10 \pm 0.01$  min<sup>-1</sup>, in fair agreement with previous measurements reporting  $K_{tx} = 4 - 9$  nM  
154 for T7 RNA polymerase (30, 32, 33),  $K_{tl} = 66$  nM (30) and  $k_m = 0.2$  min<sup>-1</sup> (30, 34).  
155 In summary, the saturation of transcription by DNA occurs at a concentration two-orders  
156 of magnitude lower than the saturation of translation by RNA and the TX-TL system acts  
157 as a linear amplifier of the concentration of active RNA,  $R_{act}$ , with a readout of intensity  
158 fluorescence. As a result we can use GFP fluorescence as a measure of the concentration of  
159  $R_{act}$ .

### 160 **2.3 Expression from DNA provides information on the saturation** 161 **of transcriptional resources**

162 When riboregulators are used in vivo the DNA sequences  $D_{cr}$  and  $D_{ta}$ , respectively coding  
163 for the cis-repressed and trans-activator RNA sequences  $R_{cr}$  and  $R_{ta}$ , can either be inserted  
164 in the chromosome, in the same plasmid or in two different plasmids. This last case is  
165 common (18, 35) and a usual strategy to try to improve the riboregulator's performance is  
166 to increase the effective concentration of  $R_{ta}$  by inserting  $D_{ta}$  in a high-copy plasmid. To

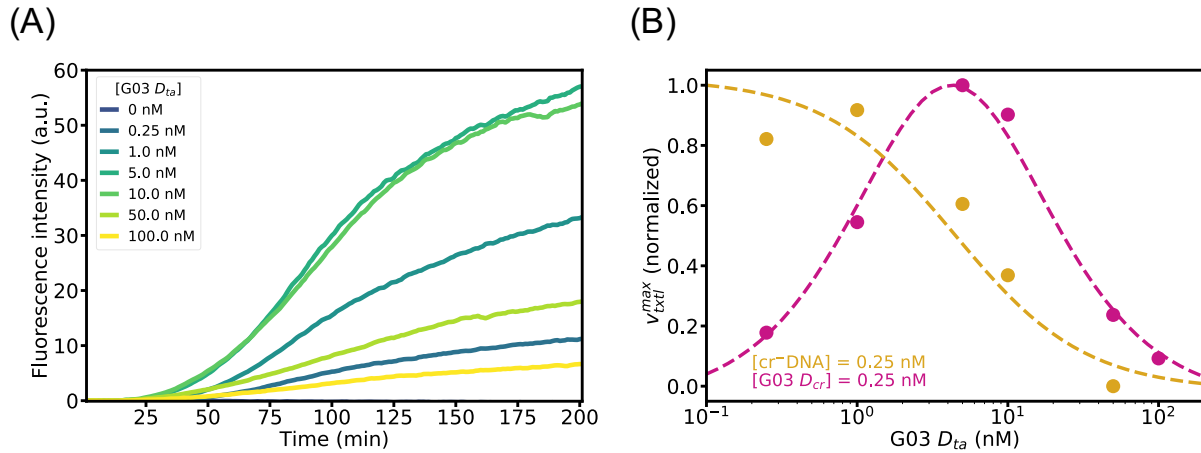

Figure 3: Titration of a riboregulator at the DNA level shows saturation of transcriptional resources. (A) Fluorescence intensity vs. time for the in vitro expression of 0.25 nM of  $D_{cr}$  DNA, coding for GFP, with increasing concentrations of  $D_{ta}$  DNA, for riboregulator G03. (B) Normalized maximum fluorescence intensity production rate for a  $D_{cr}$  with, G03 (pink disks), or without,  $cr^-$  (yellow disks), cis regulatory region as a function of the concentration of  $D_{ta}$  from riboregulator G03. Dotted lines correspond to simulations of (6-7) together with (15-17).

167 test the effect of an increase in  $D_{ta}$  concentration in the performances of the riboregulator  
 168 we performed a TX-TL expression experiment with two linear DNA fragments,  $D_{cr}$  and  $D_{ta}$ .  
 169 Within the TX-TL system the two DNA molecules are transcribed into the corresponding  
 170 RNA strands, which associate into a coding RNA,  $R_{act}$ . The production of P mainly comes  
 171 from the translation of  $R_{act}$  but also may come from  $R_{cr}$ , when cis-repression is not very  
 172 effective. We thus write the following mechanism,

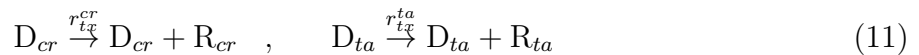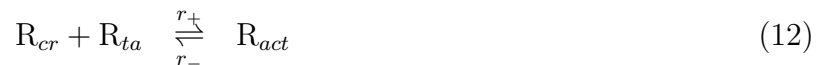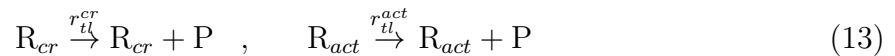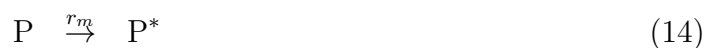

173 We titrated riboregulator G03 (SI Table S1) by keeping  $D_{cr} = 0.25$  nM constant, varying

174  $D_{ta}$  in the range 0 – 100 nM and recording the GFP fluorescence over time (Figure 3).  
175 Increasing  $D_{ta}$  in the range 0 – 5 nM resulted in an increased fluorescence signal. However,  
176 for  $D_{ta} > 5$  nM the fluorescence signal dramatically decreased until reaching 10% of the  
177 maximum production rate at  $D_{ta} = 100$  nM. To explain this behaviour we hypothesized  
178 that  $D_{ta}$  and  $D_{cr}$  compete for transcriptional resources, i.e. a very high concentration of  
179  $D_{ta}$  inhibits the transcription of  $D_{cr}$ , thus reducing the concentration of  $R_{act}$ . To test this  
180 hypothesis we titrated  $cr^-$ DNA, which lacks the cis-regulatory region, with the  $D_{ta}$  of  
181 riboregulator G03. In agreement with our hypothesis, increasing  $D_{ta}$  steadily decreased the  
182 maximum fluorescence rate,  $v_{txl}^{max}$  (Figure 3B), thus showing that the transcription of an  
183 orthogonal RNA strongly reduces the expression of the target mRNA.

184 To understand the role of saturation of transcriptional resources, we modeled reactions  
185 (11-14) by the rate equations (4-7) but we replaced the production rate of  $R_{act}$  (5) by  
186 the following set of equations, that takes into account the competition for transcriptional  
187 resources,

$$\frac{dR_{cr}}{dt} = r_{tx}^{cr} = \frac{k_{tx} \cdot D_{cr}}{K_{tx} + D_{cr} + D_{ta}} \quad (15)$$

$$\frac{dR_{ta}}{dt} = r_{tx}^{ta} = \frac{k_{tx} \cdot D_{ta}}{K_{tx} + D_{cr} + D_{ta}} \quad (16)$$

$$R_{act} = \frac{R_{cr}R_{ta}}{K_d} \quad (17)$$

188 where we have assumed that the hybridization reaction (12), with dissociation equilibrium  
189 constant  $K_d$ , is fast compared to the other reactions. From (15) it appears that  $r_{tx}^{cr} \ll 0$   
190 when  $D_{ta}/K_{tx} \gg 1$ , which we confirmed by solving the system of equations (6-7) together  
191 with (15-17), taking  $K_d = 100$  nM (Table 1). We obtained the dashed lines in Figure 3  
192 that are in very good agreement with experimental data. This in vitro result let us predict  
193 that inserting  $D_{ta}$  in a high-copy plasmid will decrease the performance of the riboregulator  
194 activator.

195 **2.4 Translation from RNA characterizes the reaction between the**  
 196 **cis-repressed and the trans-activator RNA**

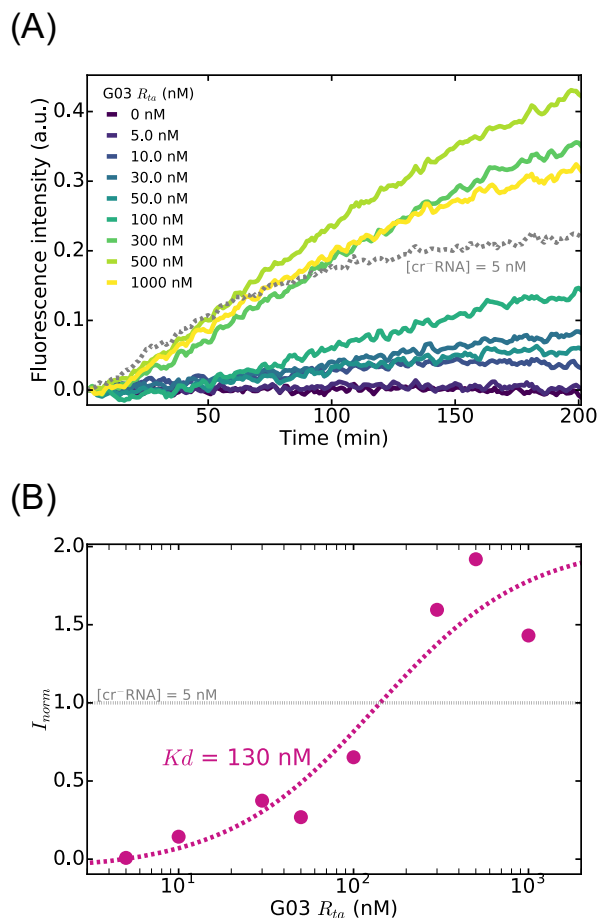

Figure 4: Titration of a riboregulator at the RNA level measures the dissociation constant of the riboregulator complex. GFP fluorescence produced over time (A) and normalized maximum fluorescence production rate (B) for different trans-activator concentrations,  $R_{ta}$ . As a control, panel A shows the fluorescence intensity produced by the translation of 5 nM of an unregulated cr<sup>-</sup>RNA (orange dashes). In (B) disks correspond to experimental data and the dashed line is a fit of (18) to the data. Data for riboregulator G03.

197 The regulatory step of translational riboregulators takes place when the two RNA frag-  
 198 ments,  $R_{cr}$  and  $R_{ta}$  hybridize and thereby change the accessibility of the ribosome to a site  
 199 needed for initiating translation (RBS or AUG). The core of the riboregulation process can  
 200 thus be described with reactions (12) and (13), where the first reaction involves the hy-  
 201 bridization of  $R_{cr}$  with  $R_{ta}$  to form an active RNA complex,  $R_{act}$ , that can be translated,

202 and the second reaction the translation of  $R_{act}$  into protein P. It is not straightforward to  
203 characterize the thermodynamics of the first reaction. One possibility is to use an elec-  
204 trophoretic mobility shift assay in a polyacrylamide gel. Another way uses the property of a  
205 reverse transcriptase to terminate on stable RNA duplexes (10). In both cases these assays  
206 characterize the species  $R_{act}$  for being a duplex RNA but they are not sensitive to its trans-  
207 lational activity. Here, instead, we probed the equilibrium concentration of  $R_{ta}$  that is active  
208 for translation. Our method is thus more meaningful to evaluate the design performances of  
209 a riboregulator.

210 We tested two types of riboregulators, two loop-mediated (19) and three toehold-mediated  
211 riboregulators (18). In the former, the RBS is buried inside the hairpin and the  $R_{ta}$  binds  
212 first to the loop on the hairpin. In the later, the start codon is protected by the hairpin and  
213 the  $R_{ta}$  binds to a toehold sequence on the 5' side of the hairpin. We in vitro transcribed  
214 the  $R_{cr}$  and  $R_{ta}$  of these riboregulators (Figure S??) and studied their translation dynamics  
215 by titrating 5 nM  $R_{cr}$  with increasing concentrations of its corresponding  $R_{ta}$  in the range  
216 0 – 1000 nM (Figure 4 and SI Figure S4). Because translation linearly amplifies  $R_{act}$  (Fig-  
217 ure 2B and (9)), measuring the GFP intensity at a given time is directly proportional to the  
218 concentration of  $R_{act}$  that is translationally active. We thus plotted the normalized GFP  
219 fluorescence at 200 min as a function of the log of  $R_{ta}$  concentration. For a bimolecular  
220 equilibrium such as (12) one expects these plots to be described by

$$I_{norm} \sim \bar{R}_{act} = \frac{1}{2}R_{cr}^0 \left( \frac{K_d + R_{cr}^0 + R_{ta}^0}{R_{cr}^0} - \sqrt{\left( \frac{K_d + R_{cr}^0 + R_{ta}^0}{R_{cr}^0} \right)^2 - 4 \frac{R_{ta}^0}{R_{cr}^0}} \right) \quad (18)$$

221 where  $\bar{R}_{act}$  is the equilibrium concentration of  $R_{act}$  and superscript 0 indicates initial concen-  
222 trations. Our experimental data followed well this trend (Figures 4 and S4). We thus fitted  
223 (18) to the data and found dissociation equilibrium constants in the range 10 – 2000 nM (Ta-  
224 ble 1), in agreement with  $K_d$  values of the order of 100 nM that have already been reported  
225 for loop-mediated activators (10). However, in one case, for G01, after a normal sigmoidal

226 increase of  $I_{norm}$  vs.  $R_{ta}$ ,  $I_{norm}$  decreased for  $R_{ta} > 200$  nM (Figure S4). To evaluate why  
227 in this particular case high  $R_{ta}$  inhibited translation, we performed a control experiment  
228 where a well-behaved regulator, G80, activated with 100 nM of its corresponding  $R_{ta}$ , was  
229 titrated with increasing concentrations of  $R_{ta}$ -G01 (Figure 5). We observed again that very  
230 high concentrations of  $R_{ta}$ -G01 significantly reduced the final GFP concentration. We thus  
231 concluded that  $R_{ta}$ -G01 poisoned the translation machinery, probably by nonspecific binding  
232 to other RNA components, including tRNAs, ribosomes, mRNAs, with about 1  $\mu$ M affinity.

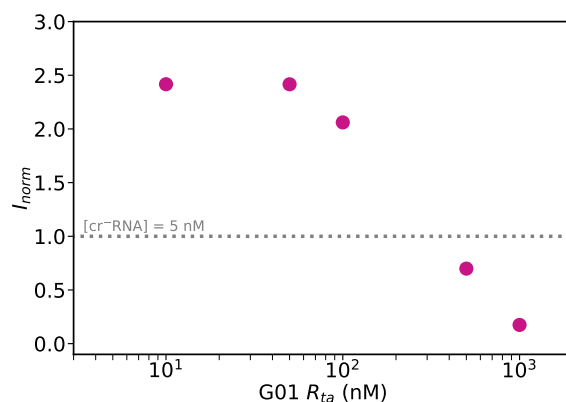

Figure 5: Titration of activated riboregulator G80 ( $R_{cr} = 5$  nM  $R_{ta} = 50$  nM) with increasing concentrations of  $R_{ta}$  from riboregulator G01.

233 To assess the performance of our method for measuring  $K_d$ , we independently measured  
234 it with a standard mobility-shift assay performed with capillary gel electrophoresis. We used  
235 the same purified  $R_{cr}$  and  $R_{ta}$  that we mixed together at 37°C in a buffer with identical salt  
236 composition than the TX-TL system during 10 min before performing the electrophoresis  
237 assay.  $R_{cr}$  concentration was 8.3 nM and the  $R_{ta}$  concentration was ranging from 0 to 200  
238 nM. Figure 6 shows the electropherograms for riboregulator G03, where a peak in intensity  
239 at a given time point corresponds to an RNA structure. In our experiments we detected  
240 three main peaks corresponding to  $R_{ta}$  at 22 s (Figure SS??) and  $R_{cr}$  and  $R_{act}$  complex  
241 between 37 and 40 s (Figure 6A). Interestingly, species  $R_{cr}$  and  $R_{act}$  yielded well-resolved  
242 peaks for toehold-mediated but not for loop-mediated riboregulators (Figure SS??). As a  
243 result this method only provided  $K_d$  for some but not all of the tested riboregulators, in

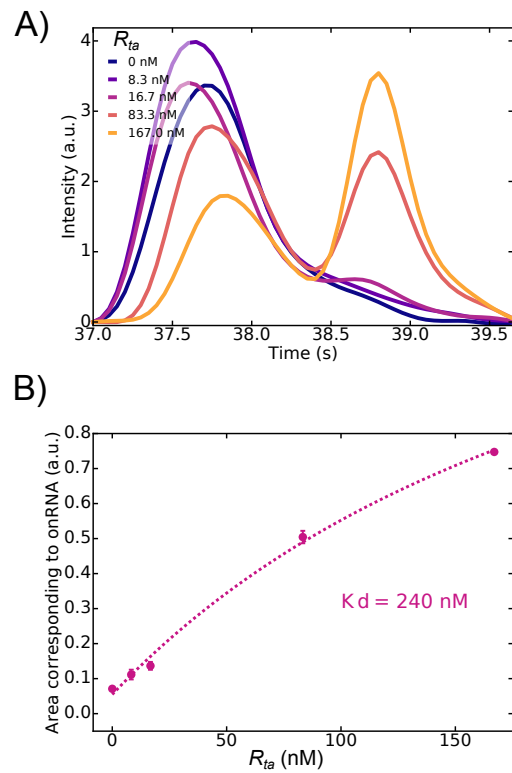

Figure 6: Titration of translational riboregulator G03 by mobility-shift capillary electrophoresis. (A) Corrected electropherograms vs. elution time and (B) peak area for different concentrations of  $R_{ta}$ . Error bars correspond to one sigma of a triplicate experiment. Dashed line is a fit of (18) to the data.



244 contrast with the TX-TL method. The values obtained were of the same order of magnitude  
245 of those obtained by TX-TL. However, mobility-shift assay yielded  $K_d$  in a narrower range  
246 of 100 – 250 nM, while TX-TL was able to better discriminate  $K_d$  for the same species and  
247 provided values in the range 8 – 160 nM (Table 1).

Table 1: Dissociation constants  $K_d$  at 37°C for the studied riboregulator devices measured using the cell-free translation method (txtl) and the mobility-shift method (ms). N.M. indicates that the electropherogram showed ill-defined peaks from which  $K_d$  could not be extracted.

| Device | $K_d^{txtl}$ (nM) | $K_d^{ms}$ (nM) |
|--------|-------------------|-----------------|
| RAJ11  | $15 \pm 14$       | N.M.            |
| RAJ12  | $2220 \pm 950$    | N.M.            |
| G01    | $46 \pm 56$       | $180 \pm 20$    |
| G03    | $134 \pm 80$      | $240 \pm 110$   |
| G80    | $31 \pm 19$       | $110 \pm 90$    |

### 248 3 Conclusion

249 We have demonstrated that in vitro transcription-translation (TX-TL) systems are an at-  
250 tractive platform to quantitatively characterize translational riboregulators. To do so we  
251 have taken advantage of the ribosome as a molecular machine that measures the concen-  
252 tration of RNA complexes that are translationally active. We have shown that increasing  
253 the DNA concentration of the trans-activating species inhibits expression by the satura-  
254 tion of the RNA polymerase, and we have predicted that inserting trans-activating elements  
255 in high-copy plasmids in vivo should limit the efficiency of translational activators. By  
256 titrating the cis-repressed gene with the trans-activating species at the RNA level we could  
257 determine dissociation constants,  $K_d$ , for the RNA hybridization reaction in a very simple  
258 manner. In particular, we could obtain  $K_d$ 's for riboregulators that could not be resolved by  
259 mobility-shift assays. Our method thus provides a simple and rapid way for the quantitative  
260 characterization of riboregulators.

261 Combined with other biomolecular techniques such as molecular beacons (33) and automated-

262 based designs (36), cell-free transcription-translation systems are becoming essential for a  
263 wide brand of applications. They allow to verify theoretical predictions on both RNA struc-  
264 tures and behaviour of large scale regulatory networks. Their versality is a real asset for  
265 conceiving new synthetic biological features (37) and creating innovative biomolecular tools  
266 (38). The use of an in vitro step in the design and elaboration of complex synthetic regula-  
267 tory networks will maximise the chance of expected in-vivo performances.

## 268 4 Methods

### 269 DNA and RNA preparations

270 DNA templates were prepared by PCR amplification of plasmids encoding for the RNA  
271 translational regulators, followed by affinity column purification using Monarch PCR Pu-  
272 rification Kit (New England BioLabs) or PureLink PCR Purification Kit (Thermo Fisher  
273 Scientific). Primers used for PCR amplification contained a T7 promotor or a T7 terminator  
274 (Biomers). RNA templates were prepared by in vitro transcription followed by purification  
275 using MEGAclear Transcription Clean-Up Kit (Ambion). The DNA and RNA integrity was  
276 determined by a 2% agarose gel and the concentrations were determined by absorbance at  
277 260 nm using a NanoDrop 2000 UV-Vis spectrophotometer. The sequences of the riboregu-  
278 lator domains (Table S1), of the PCR primers (Table S2) and of the plasmids are compiled  
279 in the SI.

### 280 Preparation of the PURE TX-TL system

281 The PURE TX-TL system was prepared according to (39) to reach the following compo-  
282 sition: 1 units/ $\mu$ L of RNase inhibitor Murine (New England Biolabs), 50 mM Hepes-KOH  
283 pH 7.6, 13 mM magnesium acetate, 100 mM potassium glutamate, 2 mM spermidine, 1  
284 mM dithiothreitol (DTT), 2 mM of each ATP and GTP, 1 mM of each CTP and UTP,  
285 20 mM creatine phosphate, 0.3 mM 20 amino acids, 56 A260/ml tRNA mix (Roche), 10

286  $\mu\text{g}/\text{mL}$  10-formyl-5, 6, 7, 8-tetrahydrofolic acid, 0.1 mM each of amino acids, and factor  
287 mix. The factor mix contained 1.2  $\mu\text{M}$  ribosome, 10  $\mu\text{g}/\text{ml}$  IF1, 40  $\mu\text{g}/\text{ml}$  IF2, 10  $\mu\text{g}/\text{ml}$   
288 IF3, 50  $\mu\text{g}/\text{ml}$  EF-G, 100  $\mu\text{g}/\text{ml}$  EF-Tu, 50  $\mu\text{g}/\text{ml}$  EF-Ts, 10  $\mu\text{g}/\text{ml}$  RF1, 10  $\mu\text{g}/\text{ml}$  RF2,  
289 10  $\mu\text{g}/\text{ml}$  RF3, 10  $\mu\text{g}/\text{ml}$  RRF, 600-6000 U/ml of each ARS and MTF 4.0  $\mu\text{g}/\text{ml}$  creatine  
290 kinase (Roche), 3.0  $\mu\text{g}/\text{ml}$  myokinase (Sigma), 1.1  $\mu\text{g}/\text{ml}$  nucleoside-diphosphate kinase, 1.0  
291 U/ml pyrophosphatase (Sigma), and 10  $\mu\text{g}/\text{ml}$  of T7 RNA polymerase.

## 292 **Fluorescence measurements in real-time PCR machine**

293 Rotor-GeneQ real-time PCR (Qiagen) was used to record fluorescence from GFP expression  
294 (excitation  $470\pm 10$  nm, emission  $510\pm 5$  nm) in a 15  $\mu\text{L}$  volume. The temperature was set  
295 to  $37^\circ\text{C}$  and fluorescence recorded every minute for at least 3 h.

## 296 **Data processing**

297 Data were processed using in-house Python routines. For each condition of template —  
298 DNA or RNA— concentration, fluorescence intensity plots were shifted to the origin by  
299 removing the mean value of the three first minutes and by subtracting the fluorescence due  
300 to the PURE TX-TL system without any template. Corrected data were filtered using a  
301 Savitzky–Golay filter (window length: 21, polynomial order: 3) to remove residual noise  
302 before being derived to compute  $v^{max}$ .

## 303 **Electrophoretic mobility shift assays**

304 Electrophoretic mobility shift assays were performed with a 2100 Bioanalyzer System (Ag-  
305ilent Technologies) and an RNA Nano chip Kit. Samples were prepared by mixing RNA  
306 strands in 50 mM Hepes-KOH pH 7.6, 13 mM magnesium acetate, 100 mM potassium glu-  
307tamate, 2 mM spermidine, 1 mM DTT and nuclease free water. They were incubated at  $37^\circ\text{C}$   
308 for 10 min before being loaded into the electrophoresis chip. Electropherograms were manu-

309 ally aligned along the time axis. Affine curves corresponding to the backgrounds of zones of  
310 interest were subtracted. Areas under peaks were determined by numerical integration and  
311 were normalized using an RNA marker provided in Agilent's kit.

## 312 **Acknowledgement**

313 The authors thank H. Isambert for helpful discussions, A. Green for providing the expression  
314 plasmids coding for the toehold-mediated riboregulators and J.-C. Galas for comments on the  
315 manuscript. This research was supported by the European commission FET-Open program  
316 under award Ribonets (323987).

## 317 **Supporting Information Available**

318 This material is available free of charge via the Internet at <http://pubs.acs.org/>.

## 319 **References**

- 320 1. Gardner, T. S., Cantor, C. R., and Collins, J. J. (2000) Construction of a genetic toggle  
321 switch in *Escherichia coli*. *Nature* *403*, 339–342, 10.1038/35002131.
- 322 2. Elowitz, M. B., and Leibler, S. (2000) A synthetic oscillatory network of transcriptional  
323 regulators. *Nature* *403*, 335–338.
- 324 3. Cameron, D. E., Bashor, C. J., and Collins, J. J. (2014) A brief history of synthetic  
325 biology. *Nat Rev Micro* *12*, 381–390.
- 326 4. Purnick, P. E. M., and Weiss, R. (2009) The second wave of synthetic biology: from  
327 modules to systems. *Nat Rev Mol Cell Biol* *10*, 410–422, 10.1038/nrm2698.
- 328 5. Das, R., and Baker, D. (2008) Macromolecular Modeling with Rosetta. *Annual Review*  
329 *of Biochemistry* *77*, 363–382.

- 330 6. Schaerli, Y., Munteanu, A., Gili, M., Cotterell, J., Sharpe, J., and Isalan, M.  
331 (2014) A unified design space of synthetic stripe-forming networks. *Nat Commun* 5,  
332 10.1038/ncomms5905.
- 333 7. Zuker, M. (2003) Mfold web server for nucleic acid folding and hybridization prediction.  
334 *Nucleic Acids Res.* 31, 3406–3415, 10.1093/nar/gkg595.
- 335 8. Lorenz, R., Bernhart, S. H., Höner zu Siederdissen, C., Tafer, H., Flamm, C.,  
336 Stadler, P. F., and Hofacker, I. L. (2011) ViennaRNA Package 2.0. *Algorithms for Molec-*  
337 *ular Biology* 6, 1–14.
- 338 9. Zadeh, J. N., Steenberg, C. D., Bois, J. S., Wolfe, B. R., Pierce, M. B., Khan, A. R.,  
339 Dirks, R. M., and Pierce, N. A. (2011) NUPACK: Analysis and design of nucleic acid  
340 systems. *Journal of Computational Chemistry* 32, 170–173.
- 341 10. Isaacs, F. J., Dwyer, D. J., Ding, C., Pervouchine, D. D., Cantor, C. R., and Collins, J. J.  
342 (2004) Engineered riboregulators enable post-transcriptional control of gene expression.  
343 *Nat Biotech* 22, 841–847, 10.1038/nbt986.
- 344 11. Win, M. N., and Smolke, C. D. (2007) A modular and extensible RNA-based gene-  
345 regulatory platform for engineering cellular function. *Proc. Natl. Acad. Sci. U. S. A.*  
346 104, 14283–14288.
- 347 12. Salis, H. M., Mirsky, E. A., and Voigt, C. A. (2009) Automated design of synthetic  
348 ribosome binding sites to control protein expression. *Nat. Biotechnol.* 27, 946–950.
- 349 13. Qi, L., Larson, M. H., Gilbert, L. A., Doudna, J. A., Weissman, J. S., Arkin, A. P., and  
350 Lim, W. A. (2013) Repurposing CRISPR as an RNA-Guided Platform for Sequence-  
351 Specific Control of Gene Expression. *Cell* 152, 1173–1183.
- 352 14. Chang, A. L., Wolf, J. J., and Smolke, C. D. (2012) Synthetic RNA switches as a tool

- 353 for temporal and spatial control over gene expression. *Current opinion in biotechnology*  
354 *23*, 679–688.
- 355 15. Chappell, J., Takahashi, M. K., and Lucks, J. B. (2015) Creating small transcription  
356 activating RNAs. *Nat. Chem. Biol.* *11*, 214–20.
- 357 16. Rinaudo, K., Bleris, L., Maddamsetti, R., Subramanian, S., Weiss, R., and Benenson, Y.  
358 (2007) A universal RNAi-based logic evaluator that operates in mammalian cells. *Nat.*  
359 *Biotechnol.* *25*, 795–801.
- 360 17. Chappell, J., Watters, K. E., Takahashi, M. K., and Lucks, J. B. (2015) A renaissance in  
361 RNA synthetic biology: new mechanisms, applications and tools for the future. *Current*  
362 *Opinion in Chemical Biology* *28*, 47–56.
- 363 18. Green, A. A., Silver, P. A., Collins, J. J., and Yin, P. (2014) Toehold switches: de-novo-  
364 designed regulators of gene expression. *Cell* *159*, 925–39.
- 365 19. Rodrigo, G., Landrain, T. E., and Jaramillo, A. (2012) De novo automated design of  
366 small RNA circuits for engineering synthetic riboregulation in living cells. *Proceedings*  
367 *of the National Academy of Sciences* *109*, 15271–15276.
- 368 20. Greenleaf, W. J., Frieda, K. L., Foster, D. A. N., Woodside, M. T., and Block, S. M.  
369 (2008) Direct Observation of Hierarchical Folding in Single Riboswitch Aptamers. *Sci-*  
370 *ence (80-. ).* *319*, 630–633.
- 371 21. Ge, P., and Zhang, S. (2015) Computational analysis of RNA structures with chemical  
372 probing data. *Methods* *79*, 60–66.
- 373 22. Noireaux, V., Bar-Ziv, R., and Libchaber, A. (2003) Principles of cell-free genetic circuit  
374 assembly. *Proc. Natl. Acad. Sci. U. S. A.* *100*, 12672–7.
- 375 23. Takahashi, M. K., Chappell, J., Hayes, C. A., Sun, Z. Z., Kim, J., Singhal, V.,  
376 Spring, K. J., Al-Khabouri, S., Fall, C. P., Noireaux, V., Murray, R. M., and Lucks, J. B.

- 377 (2015) Rapidly Characterizing the Fast Dynamics of RNA Genetic Circuitry with Cell-  
378 Free Transcription-Translation (TX-TL) Systems. *ACS Synthetic Biology* 4, 503–515.
- 379 24. Gruber, A. R., Lorenz, R., Bernhart, S. H., Neuböck, R., and Hofacker, I. L. (2008) The  
380 Vienna RNA websuite. *Nucleic Acids Res.* 36, 70–74.
- 381 25. Herschlag, D. (1995) RNA Chaperones and the RNA Folding Problem. *Journal of Bio-*  
382 *logical Chemistry* 270, 20871–20874.
- 383 26. Schroeder, R., Barta, A., and Semrad, K. (2004) Strategies for RNA folding and assem-  
384 bly. *Nat Rev Mol Cell Biol* 5, 908–919.
- 385 27. Shimizu, Y., Inoue, A., Tomari, Y., Suzuki, T., Yokogawa, T., Nishikawa, K., and  
386 Ueda, T. (2001) Cell-free translation reconstituted with purified components. *Nat Biotech*  
387 *19*, 751–755.
- 388 28. Whittaker, J. W. (2013) Cell-free protein synthesis: The state of the art. *Biotechnol.*  
389 *Lett.* 35, 143–152.
- 390 29. Shimizu, Y., Kanamori, T., and Ueda, T. (2005) Protein synthesis by pure translation  
391 systems. *Methods* 36, 299–304.
- 392 30. Stogbauer, T., Windhager, L., Zimmer, R., and Radler, J. O. (2012) Experiment and  
393 mathematical modeling of gene expression dynamics in a cell-free system. *Integrative*  
394 *Biology* 4, 494–501.
- 395 31. Bionumbers, <http://bionumbers.hms.harvard.edu//bionumber.aspx?id=102972&ver=8>.
- 396 32. Maslak, M., and Martin, C. T. (1993) Kinetic analysis of T7 RNA polymerase tran-  
397 scription initiation from promoters containing single-stranded regions. *Biochemistry* 32,  
398 4281–4285, PMID: 8476857.

- 399 33. Niederholtmeyer, H., Xu, L., and Maerkl, S. J. (2013) Real-Time mRNA Measurement  
400 during an in Vitro Transcription and Translation Reaction Using Binary Probes. *ACS*  
401 *Synthetic Biology* 2, 411–417.
- 402 34. Karzbrun, E., Shin, J., Bar-Ziv, R. H., and Noireaux, V. (2011) Coarse-grained dynamics  
403 of protein synthesis in a cell-free system. *Phys. Rev. Lett.* 106, 1–4.
- 404 35. Urban, J. H., and Vogel, J. *Methods in Molecular Biology*; Humana Press, 2009; pp  
405 301–319.
- 406 36. Espah Borujeni, A., Mishler, D. M., Wang, J., Huso, W., and Salis, H. M. (2016) Au-  
407 tomated physics-based design of synthetic riboswitches from diverse RNA aptamers.  
408 *Nucleic Acids Res.* 44, 1–13.
- 409 37. Iwane, Y., Hitomi, A., Murakami, H., Katoh, T., Goto, Y., and Suga, H. (2016) Ex-  
410 panding the amino acid repertoire of ribosomal polypeptide synthesis via the artificial  
411 division of codon boxes. *Nat. Chem.*
- 412 38. Pardee, K., Green, A. A., Ferrante, T., Cameron, D. E., DaleyKeyser, A., Yin, P., and  
413 Collins, J. J. (2014) Paper-Based Synthetic Gene Networks. *Cell* 159, 940–954.
- 414 39. Shimizu, Y., and Ueda, T. In *Cell-Free Protein Production: Methods and Protocols*;  
415 Endo, Y., Takai, K., and Ueda, T., Eds.; Humana Press: Totowa, NJ, 2010; pp 11–21.
